# Supplementary material
Source: HighWire-hosted journal article supplement (https://bibliotheek.ehb.be/content/88/6/512)
Supplement: inline-supplementary-material-1 [file inline-supplementary-material-1.pdf]

**Supplemental Figure 1.** Cognitive and Psychosocial Function in Alumni With and Without the Apolipoprotein  $\epsilon 4$  Allele

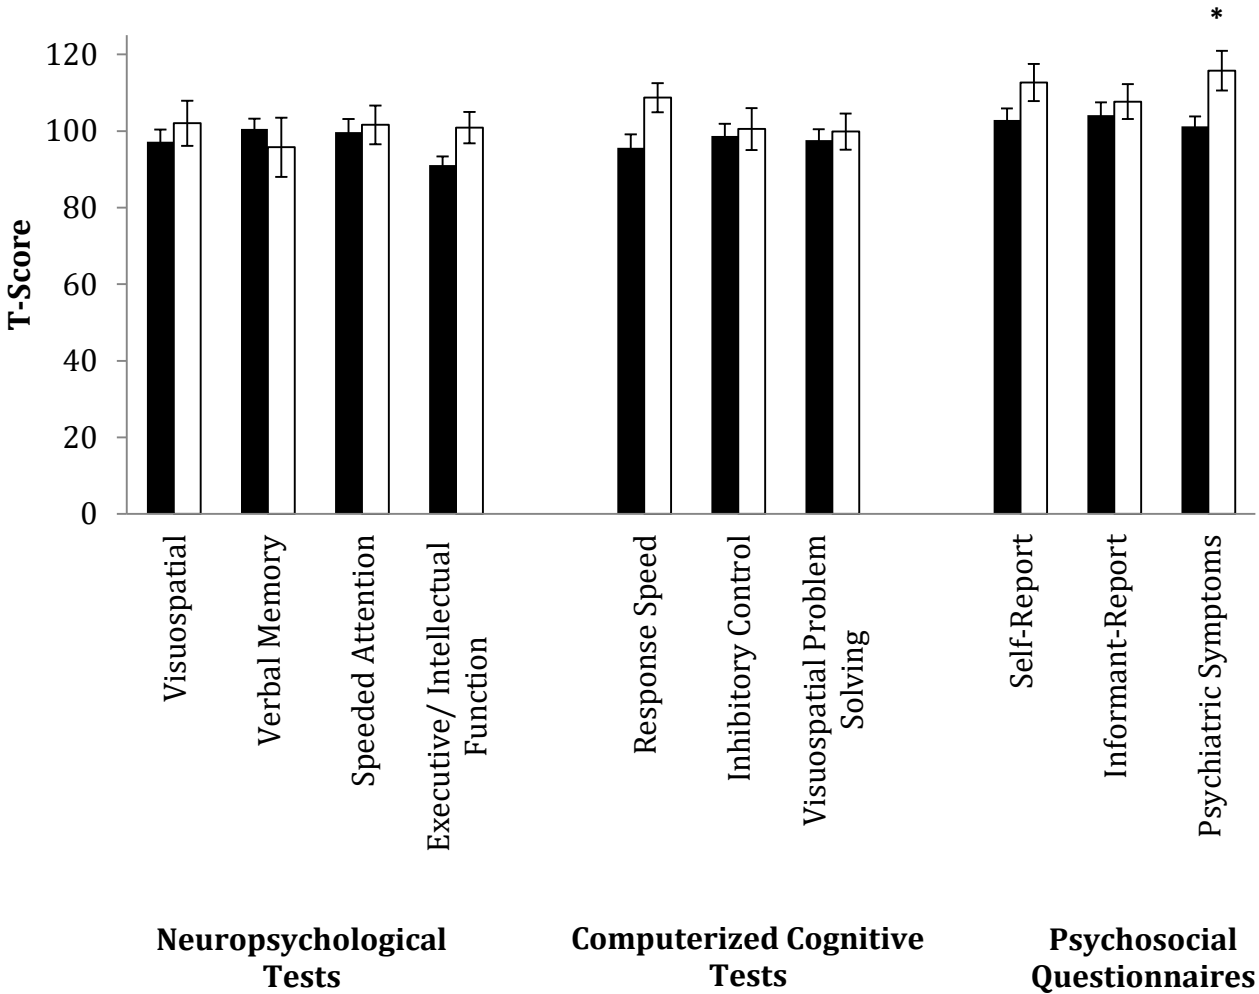

## Supplemental Figure

**Supplemental Figure 1:** Plots show mean scores for the four neuropsychological factors (visuospatial, verbal memory, speeded attention, and executive/intellectual function), three computerized cognitive factors (response speed, inhibitory control, and visuospatial problem solving), and three psychosocial factors (self-report, informant-report, and psychiatric symptoms) for participants without the apolipoprotein  $\epsilon 4$  allele (black bars) and participants with the apolipoprotein  $\epsilon 4$  allele (white bars). For descriptive purposes, factor scores were transformed to standard scores ( $M = 100$ ,  $SD = 15$ ). The participants with and without the apolipoprotein  $\epsilon 4$  allele performed similarly on objective measures of cognitive performance, with the exception of executive/intellectual functioning, where participants with the apolipoprotein  $\epsilon 4$  allele test scores were slightly higher than those without the apolipoprotein  $\epsilon 4$  allele, but this was not significant after Bonferroni correction ( $p < .013$ ). Participants with the apolipoprotein  $\epsilon 4$  allele showed greater endorsement across subjective measures of cognitive and psychiatric functioning relative to participants without the apolipoprotein  $\epsilon 4$  allele, after correction. Note: \* represents a significant group difference ( $p < .01$ ).
